# Supplementary material
Source: Royal Society of Chemistry journal article supplement (doi:10.1039/d6fo00946h)

## Supplementary Figure

Fig. S1

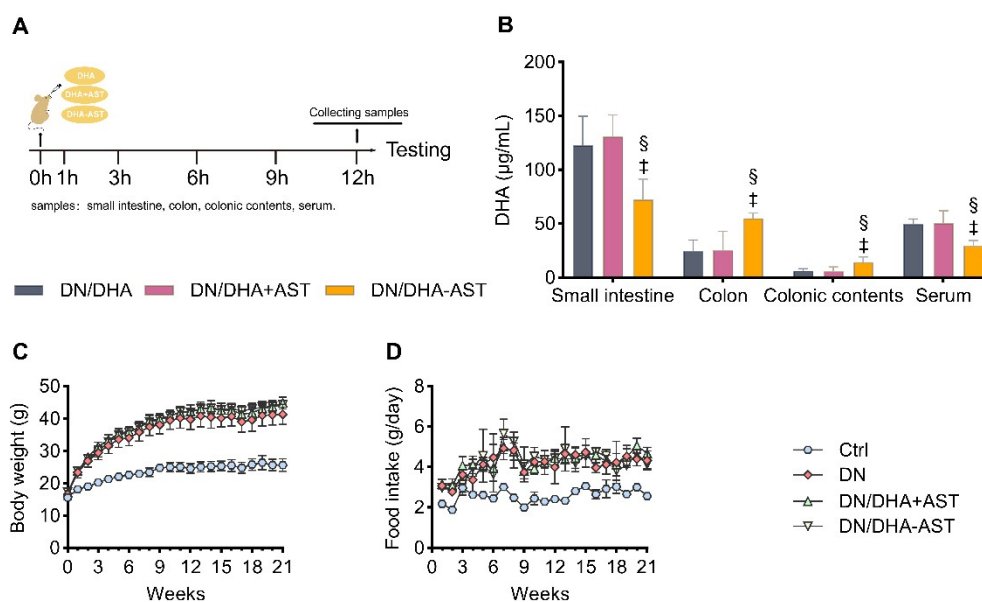

**Fig. S1. DHA-AST enables colonic enrichment of DHA in DN mice and has no effects on body weight or food intake.** (A) Schematic diagram for the verification of colon-targeting effect of DHA-AST in KKAY mice; (B) DHA levels of DN mice in the small intestine, colon, colonic contents, and serum; (C) Body weight; (D) Food intake; All data are expressed as means  $\pm$  SD ( $n=3-10$ ,  $n$  represents the number of independent biological replicates per group).  $P < 0.05$  indicates significant differences among groups.  $^{\dagger}P < 0.05$ , DN/DHA+AST vs DN/DHA group;  $^{\ddagger}P < 0.05$ , DN/DHA-AST vs DN/DHA group;  $^{\S}P < 0.05$ , DN/DHA-AST vs DN/DHA+AST group. Abbreviations: Ctrl, control; DN, diabetic nephropathy; DHA, docosahexaenoic acid; AST, astaxanthin.

**Fig. S2**

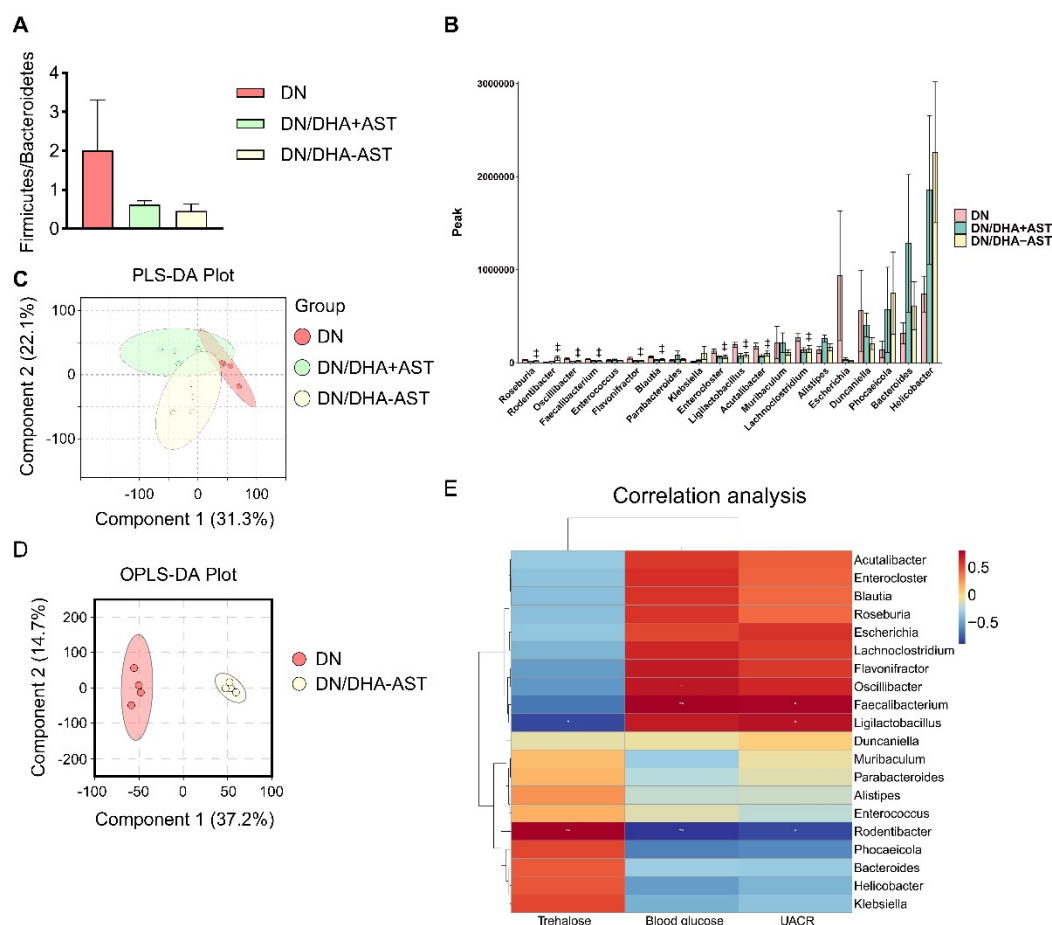

**Fig. S2. Supplementary analysis of metagenomics and metabolomics.** (A) The *Firmicutes/Bacteroidetes* ratio derived from metagenomic analysis; (B) Differential abundance analysis of the top 20 most abundant genera at the genus level; (C) PLS-DA plot derived from metabolomic analysis and (D) OPLS-DA plot ( $R^2X=0.519$ ,  $R^2Y=0.994$ ,  $Q^2=0.751$ ,  $R^2Y-Q^2 < 0.3$ ); (E) Spearman correlation analysis of differential genera with trehalose levels and kidney injury phenotypes (UACR and fasting blood glucose) (\*,  $P < 0.05$ ; \*\*,  $P < 0.01$ ). All data are expressed as means  $\pm$  SD ( $n=3-4$ ,  $n$  represents the number of independent biological replicates per group).  $P < 0.05$  indicates significant differences among groups.  $^\dagger P < 0.05$ , DN/DHA+AST vs DN

group; ‡ $P < 0.05$ , DN/DHA-AST vs DN group; § $P < 0.05$ , DN/DHA-AST vs DN/DHA+AST group. Abbreviations: PLS-DA, partial least squares discriminant analysis; OPLS-DA, orthogonal projections to latent structures discriminant analysis; Other abbreviations are the same as in **Fig. S1**.

**Fig. S3**

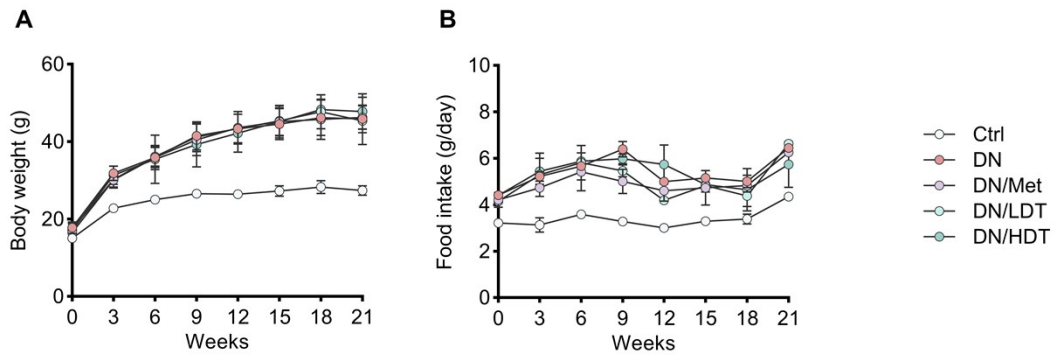

**Fig. S3. The effects of trehalose on body weight and food intake in DN mice. (A)**

Body weight; **(B)** Food intake; All data are expressed as means  $\pm$  SD (n=10, n

represents the number of independent biological replicates per group). \* $P < 0.05$

indicate significant differences among groups. Abbreviations are the same as in **Fig.**

**S1.**

**Fig. S4**

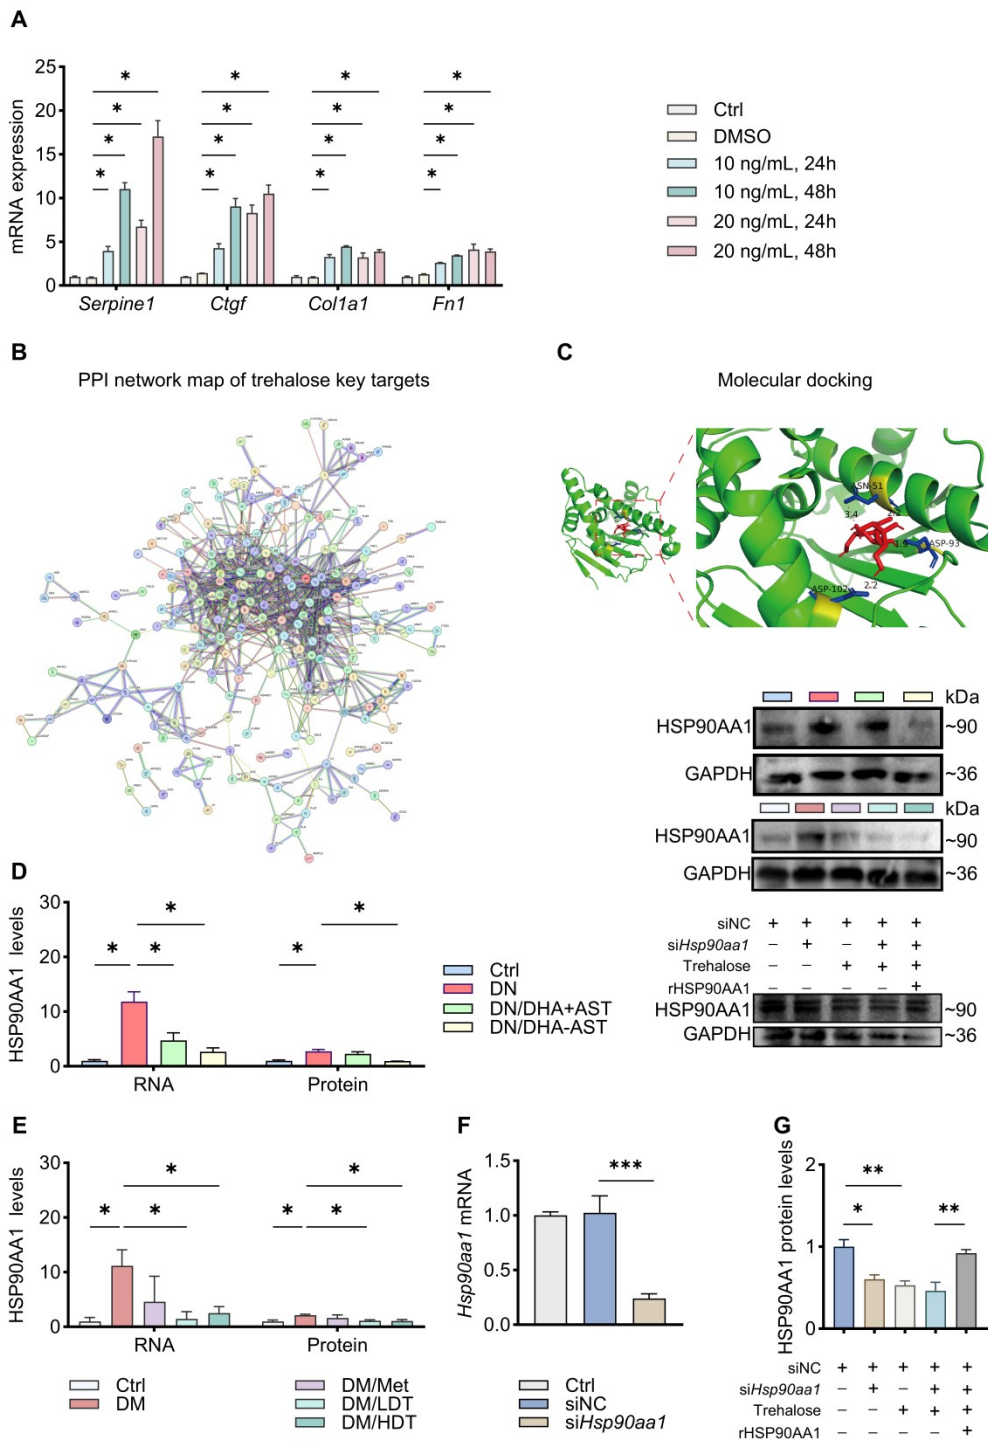

**Fig. S4. HSP90AA1 may be a key target for trehalose in ameliorating renal fibrosis.** (A) The mRNA expression of *Serpine1*, *Ctgf*, *Colla1* and *Fn1* in fibrotic GMCs induced by different concentrations of TGF- $\beta$ 1; (B) PPI network diagram of 296

key target proteins for trehalose; (C) Three-dimensional binding model of trehalose interacting with HSP90AA1 (Green, overall backbone of HSP90AA1; red sticks, bound ligand trehalose; blue sticks, key ligand-interacting amino acid residues; yellow,  $\alpha$ -helix functional domain; black numerals, atomic distances between ligand and residues.); The mRNA and protein levels of HSP90AA1 in DN mice with (D) DHA-AST and (E) trehalose; (F) The mRNA expression of *Hsp90aa1*; (G) The protein levels of HSP90AA1 after individual or combined treatment with *siHsp90aa1* (50 mM), trehalose (10 mg/mL), and rHSP90AA1 (100 ng/mL). *Gapdh* was used as the endogenous control gene for qRT-PCR analysis. GAPDH was employed as endogenous control genes for western blot analysis. Data are presented as means  $\pm$  SD (n=3-10, n represents the number of independent biological replicates per group). \* $P < 0.05$  indicates significant differences among groups; \*\*,  $P < 0.01$ ; \*\*\*,  $P < 0.001$ . Abbreviations: PPI, protein-protein interaction; HSP90AA1, heat shock protein 90 alpha family class A member 1; *siHsp90aa1*, small interfering RNA targeting *Hsp90aa1*; rHSP90AA1, recombinant HSP90AA; siNC, negative control small interfering RNA; Other abbreviations are the same as in **Fig. S1**.

**Fig. S5**

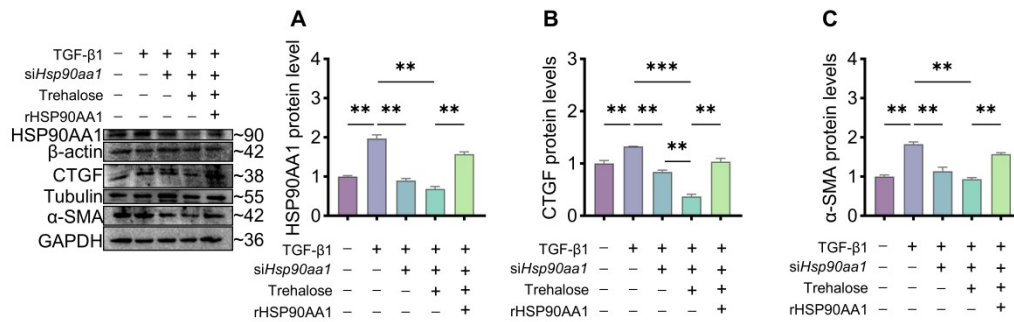

**Fig. S5. HSP90AA1 knockdown attenuated TGF-β1-induced injury and potentiated trehalose protection, which was reversed by recombinant HSP90AA1**

**supplementation.** The protein levels of (A) HSP90AA1, (B) CTGF, and (C) α-SMA

were detected after individual or combined treatment with siHsp90aa1 (50 mM), TGF-

β1 (10 ng/mL), trehalose (10 mg/mL), and rHSP90AA1 (100 ng/mL). GAPDH,

Tubulin and β-actin was employed as endogenous control genes for western blot

analysis. Data are presented as means ± SD (n=3, n represents the number of

independent biological replicates per group). \* $P < 0.05$  indicates significant differences

among groups; \*\*,  $P < 0.01$ ; \*\*\*,  $P < 0.001$ . Abbreviations: PPI, protein-protein

interaction; HSP90AA1, heat shock protein 90 alpha family class A member 1;

siHsp90aa1, small interfering RNA targeting Hsp90aa1; rHSP90AA1, recombinant

HSP90AA; siNC, negative control small interfering RNA; Other abbreviations are the

same as in Fig. S1

## Supplementary Table

**Table 1. Dietary ingredient composition of H100293G**

| <b>Components</b>                         | <b>Weight Ratio (g%)</b> | <b>Weight (g)</b> |
|-------------------------------------------|--------------------------|-------------------|
| Protein                                   | 20                       | -                 |
| Carbohydrates                             | 64                       | -                 |
| Fat                                       | 7                        | -                 |
| Total                                     | -                        | -                 |
| Casein                                    | -                        | 200               |
| Cystine                                   | -                        | 3                 |
| Corn Starch                               | -                        | 397               |
| Maltodextrin                              | -                        | 132               |
| Sucrose                                   | -                        | 100               |
| Cellulose                                 | -                        | 50                |
| Soybean Oil                               | -                        | 70                |
| Mineral Premix M1003G                     | -                        | 35                |
| Vitamin Premix V1002                      | -                        | 10                |
| Choline Bitartrate                        | -                        | 2.5               |
| Antioxidant TBHQ (tert-Butylhydroquinone) | -                        | 0.014             |
| Total                                     | -                        | 1000              |

**Table 2. Dietary ingredient composition of H10045**

| <b>Components</b>          | <b>Weight Ratio (g%)</b> | <b>Weight (g)</b> |
|----------------------------|--------------------------|-------------------|
| Protein                    | 24                       | -                 |
| Carbohydrates              | 41                       | -                 |
| Fat                        | 24                       | -                 |
| Total                      | -                        | -                 |
| Casein                     | -                        | 233.06            |
| Cystine                    | -                        | 3.5               |
| Corn Starch                | -                        | 84.83             |
| Maltodextrin               | -                        | 116.53            |
| Sucrose                    | -                        | 201.36            |
| Cellulose                  | -                        | 58.26             |
| Soybean Oil                | -                        | 29.13             |
| Lard                       | -                        | 206.84            |
| Mineral Mixture M1002      | -                        | 11.65             |
| Calcium Hydrogen Phosphate | -                        | 15.15             |
| Calcium Carbonate          | -                        | 6.41              |
| Potassium Citrate          | -                        | 19.23             |
| Vitamin Mixture V1001      | -                        | 11.56             |
| Choline Bitartrate         | -                        | 2.33              |
| Food Red Dye               | -                        | 0.058             |
| Total                      | -                        | 1000              |

**Table 3. Gene primer sequence.**

| <b>Gene Name</b>               | <b>Primer Sequence5'-3'</b>                              |
|--------------------------------|----------------------------------------------------------|
| <i>Il6</i> (Mus musculus)      | F: CTGCATTGGCATGAGGTTTG<br>R: TCAGAGGGATCTGTGTCTTCT      |
| <i>Il1b</i> (Mus musculus)     | F: AAATGCCACCTTTTGACAGTGATG<br>R: GCAGCCCTTCATCTTTTGGG   |
| <i>Tnf</i> (Mus musculus)      | F: TTGTCTTAATAACGCTGATTTGGT<br>R: GGGAGCAGAGGTTTCAGTGAT  |
| <i>Ccl2</i> (Mus musculus)     | F: TTAAAAACCTGGATCGGAACCAA<br>R: GCATTAGCTTCAGATTTACGGGT |
| <i>Sele</i> (Mus musculus)     | F: GGTGCATCTGGGGAAGTAGA<br>R: CCAGAGACCCGAGGAGAGTT       |
| <i>Nos2</i> (Mus musculus)     | F: TGCCTCTCACTCTTCCTTGG<br>R: CCCAAAGTGCTTCAGTCAGG       |
| <i>Cybb</i> (Mus musculus)     | F: CTTCTTGGGTCAGCACTGGC<br>R: GCAGCAAGATCAGCATGCAG       |
| <i>Nox4</i> (Mus musculus)     | F: CTTGGTGAATGCCCTCAACT<br>R: TTCTGGGATCCTCATTCTGG       |
| <i>Ptgs2</i> (Mus musculus)    | F: GCGACATACTCAAGCAGGAGCA<br>R: AGTGGTAACCGCTCAGGTGTTG   |
| <i>Serpine1</i> (Mus musculus) | F: AGGATCGAGGTAAACGAGAGC<br>R: GCGGGCTGAGATGACAAA        |

|                                  |                                                         |
|----------------------------------|---------------------------------------------------------|
| <i>Ctgf</i> (Mus musculus)       | F: TGACCTGGAGGAAAACATTAAGA<br>R: AGCCCTGTATGTCTTCACACTG |
| <i>Tgfb1</i> (Mus musculus)      | F: GACTCTCCACCTGCAAGACCAT<br>R: GGGACTGGCGAGCCTTAGTT    |
| <i>Colla1</i> (Mus musculus)     | F: CGGATAGCAGATTGAGAACATCCG<br>R: CGGCTGAGTAGGGAACACACA |
| <i>Acta2</i> (Mus musculus)      | F: TAACCCTTCAGCGTTCAGC<br>R: ACATAGCTGGAGCAGCGTCT       |
| <i>Fn1</i> (Mus musculus)        | F: CGGAGAGAGTGCCCCTACTA<br>R: CGATATTGGTGAATCGCAGA      |
| <i>Hsp90aa1</i> (Mus musculus)   | F: CAGAGGCGGACAAGAACGACAAG<br>R: GATCCTGTTGGCGTGCGTCTG  |
| <i>HSP90AA1</i> (Homo sapiens)   | F: CAGAGGCGGACAAGAACGACAAG<br>R: GATCCTGTTGGCGTGCGTCTG  |
| <i>Gapdh</i> (Mus musculus)      | F: TGGTGAAGGTCGGTGTGAAC<br>R: GCTCCTGGAAGATGGTGATGG     |
| <i>siHsp90aa1</i> (Mus musculus) | ACTGTCATCACGAAGCATAAC                                   |

---

**Table 4. Binding energies of trehalose with candidate protein targets.**

| <b>Compound</b> | <b>Protein Target</b> | <b>Binding Energy<br/>(kcal/mol)</b> |
|-----------------|-----------------------|--------------------------------------|
|                 | HSP90AA1              | -7.073                               |
|                 | STAT3                 | 1.05                                 |
| Trehalose       | ESR1                  | -0.28                                |
|                 | SRC                   | 1.47                                 |
|                 | AKT1                  | -0.9                                 |

Abbreviation: HSP90AA1, heat shock protein 90 alpha family class A member 1; STAT3, signal transducer and activator of transcription 3; ESR1, Estrogen Receptor 1; SRC, SRC Proto-Oncogene, Non-Receptor Tyrosine Kinase; AKT1, AKT Serine/Threonine Kinase 1.

## Uncropped original WB images

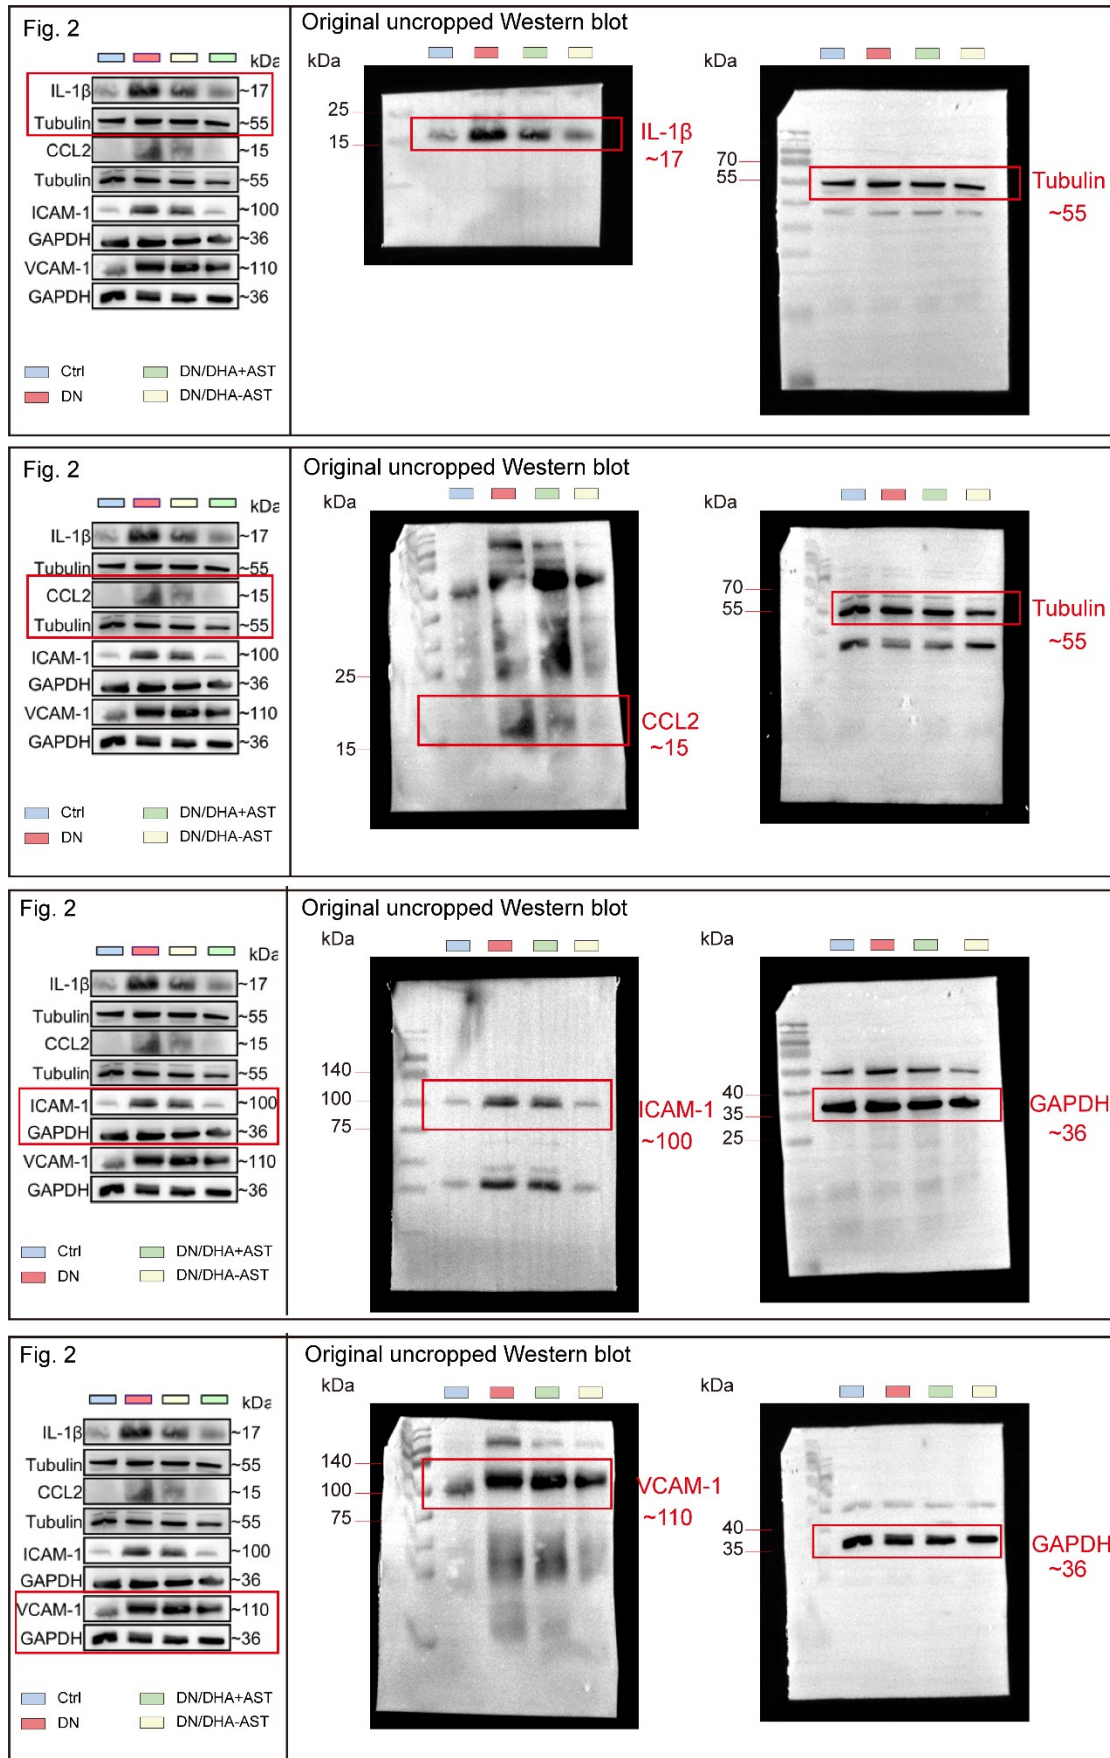

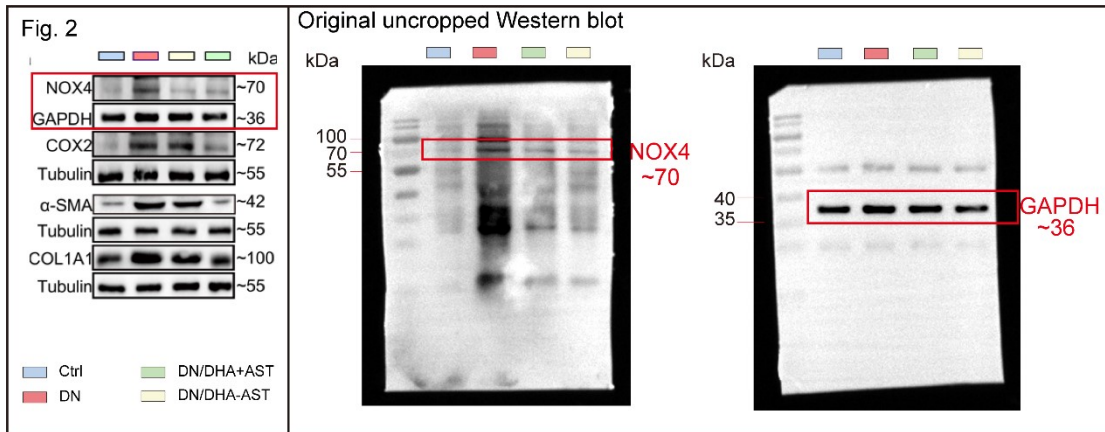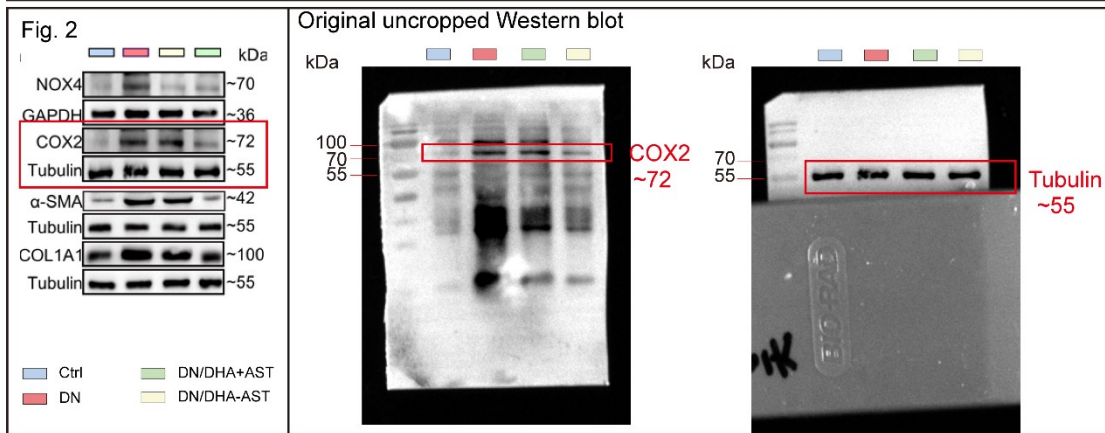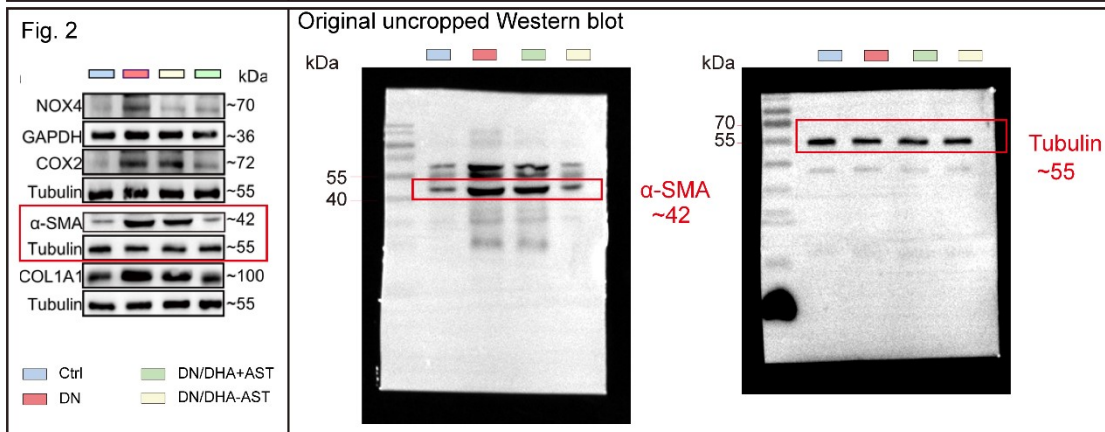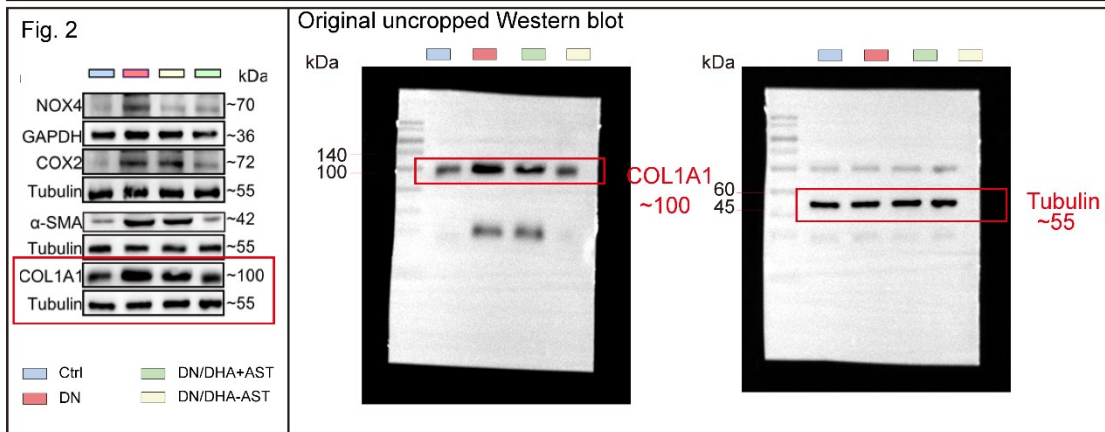

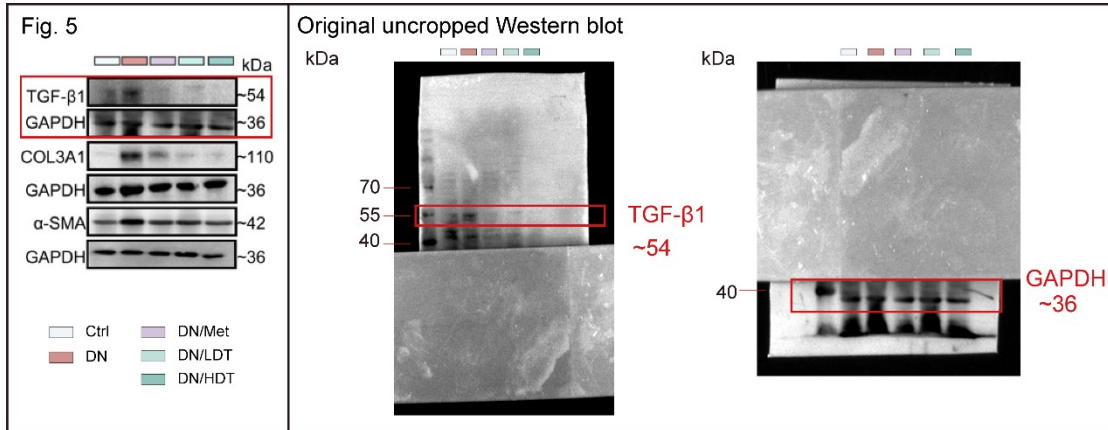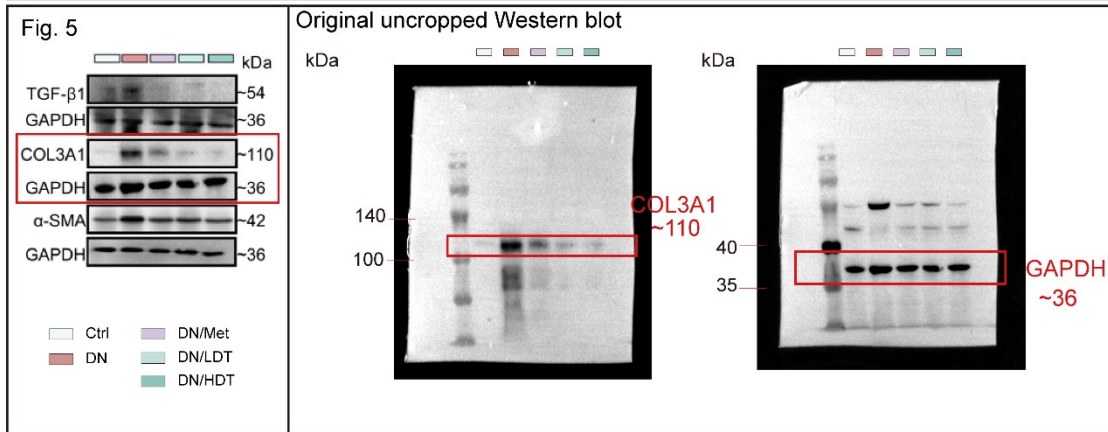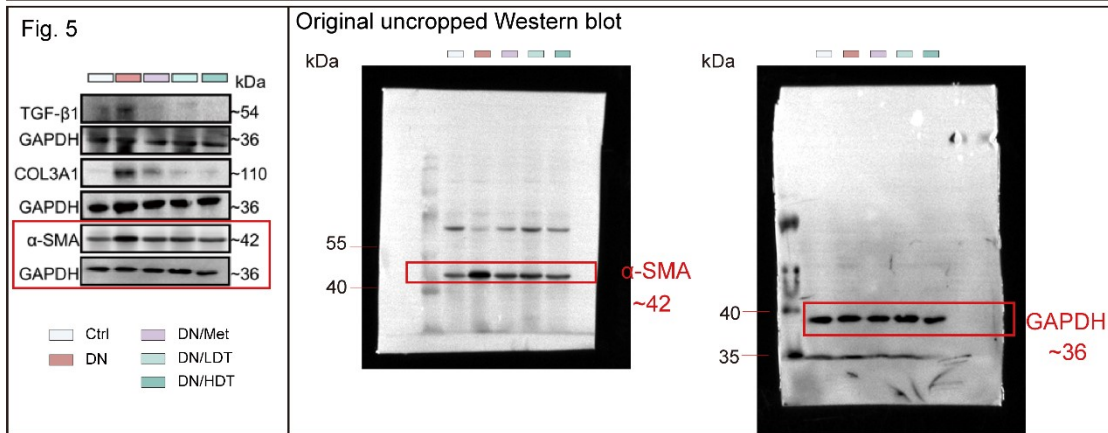

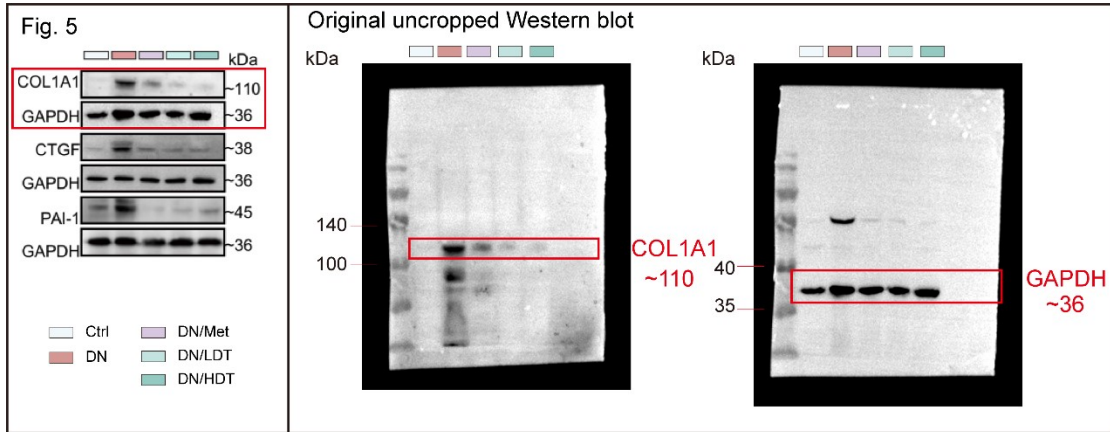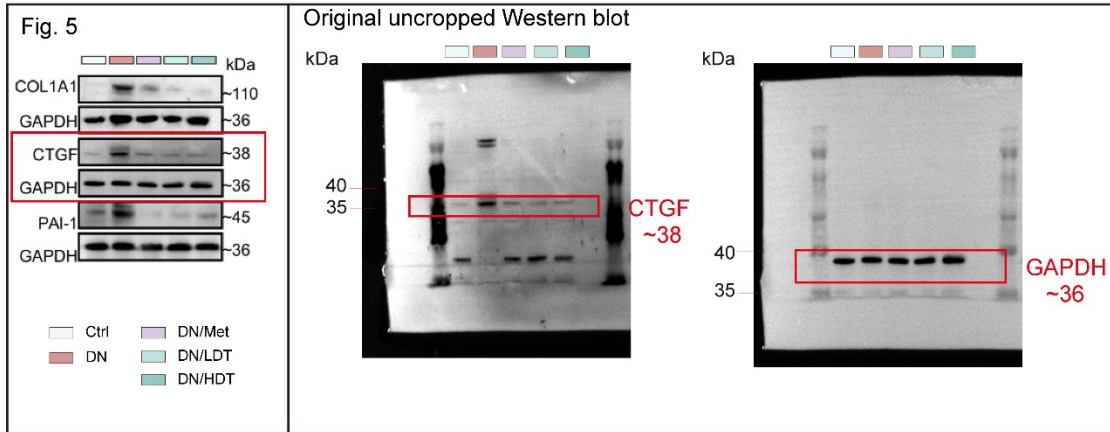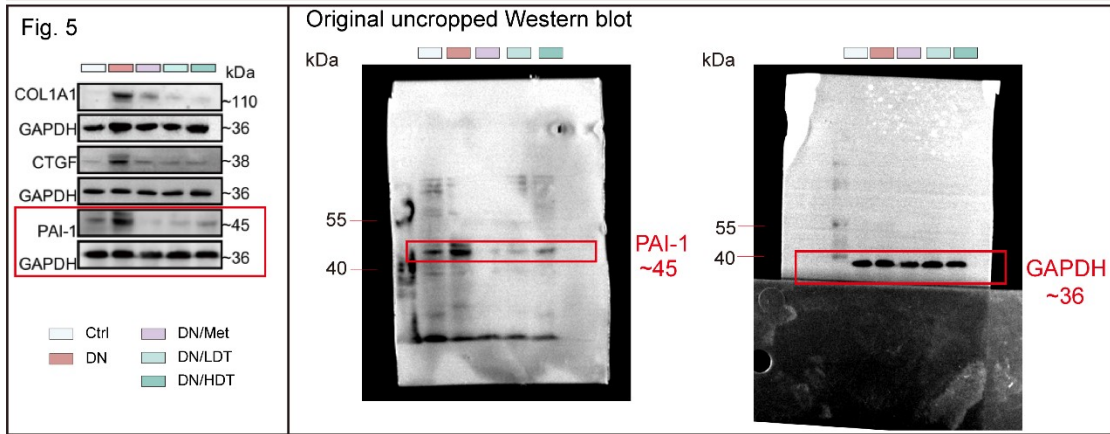

Fig. 6

■ Ctrl  
■ TGF-β1  
■ TGF-β1+Trehalose

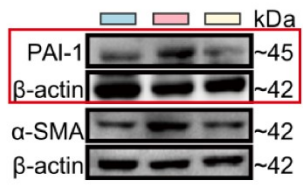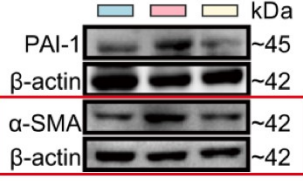

Original uncropped Western blot

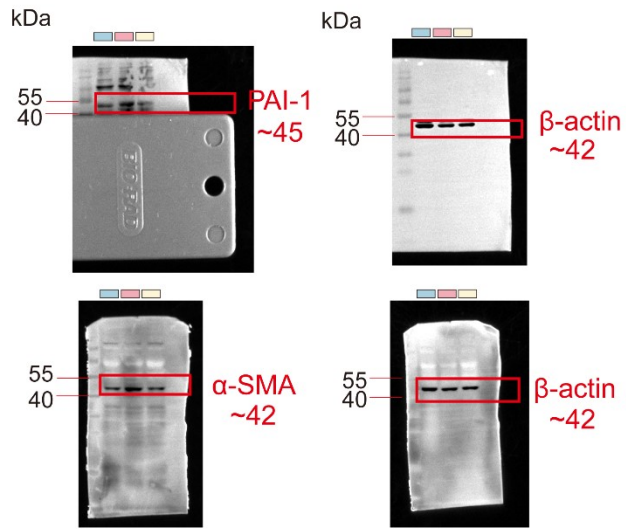

Fig. 6

■ Ctrl  
■ TGF-β1  
■ TGF-β1+Trehalose

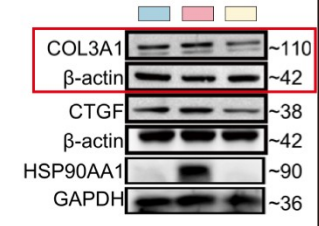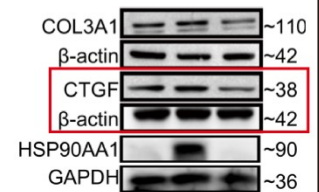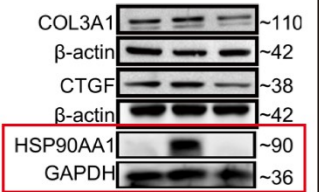

Original uncropped Western blot

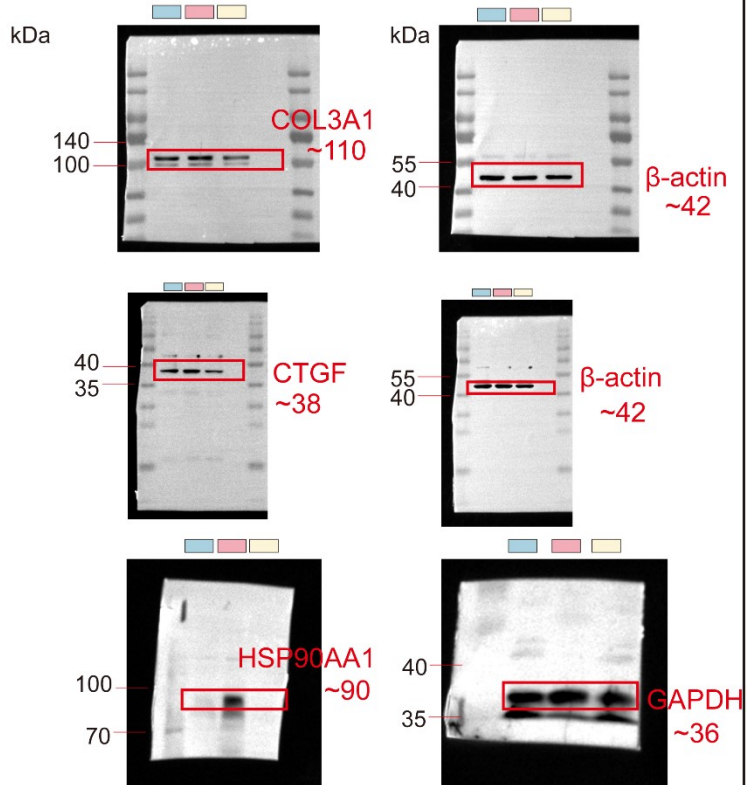

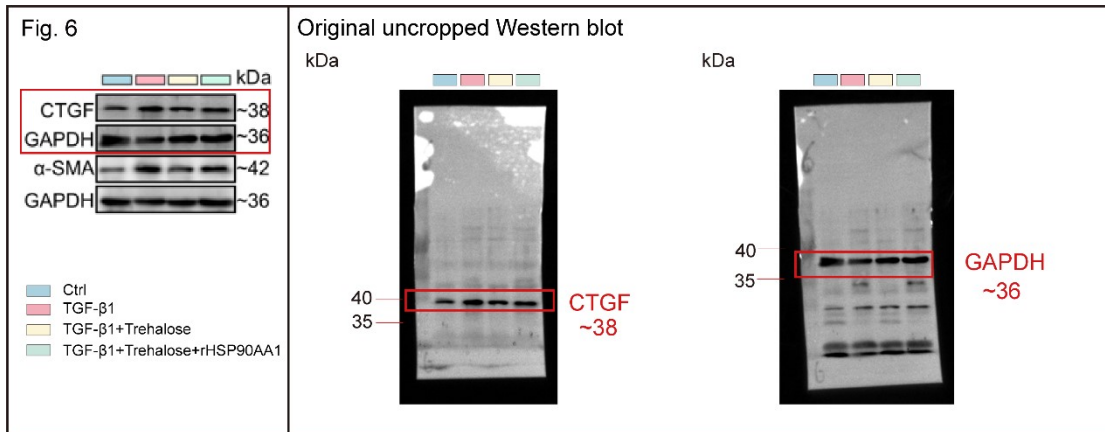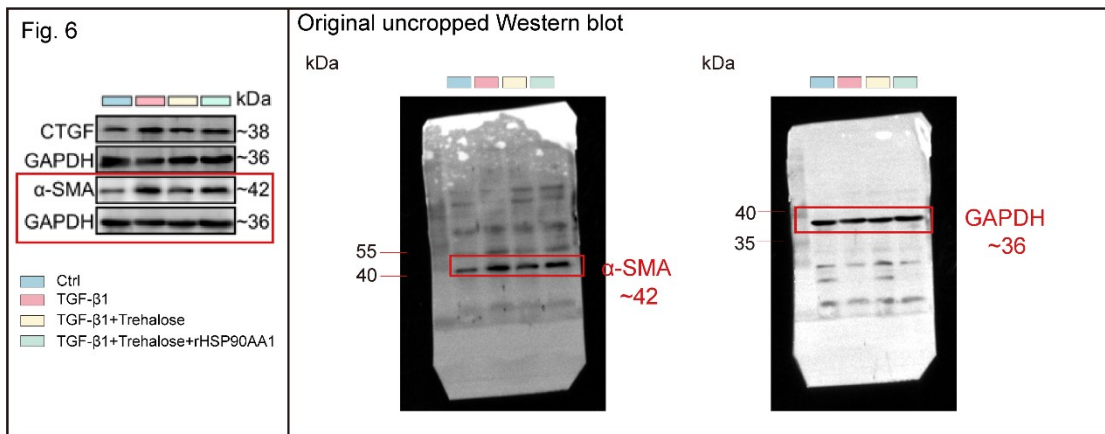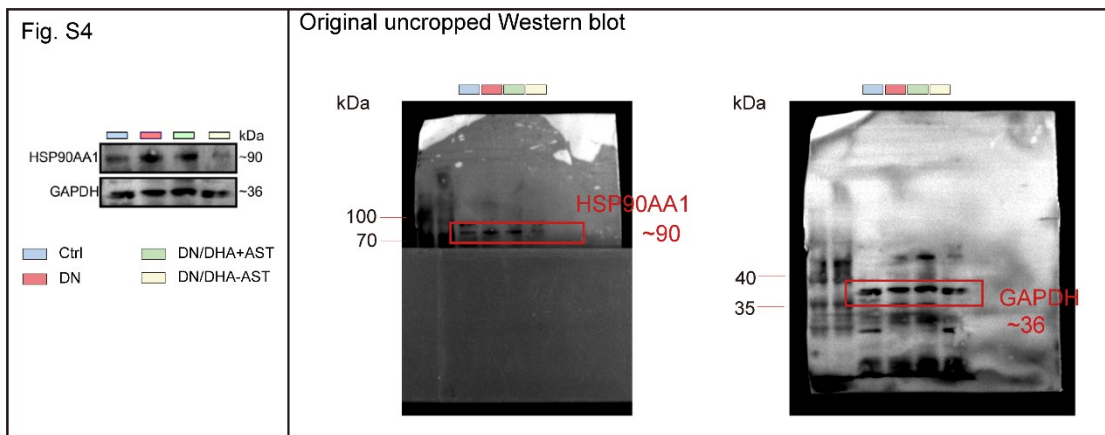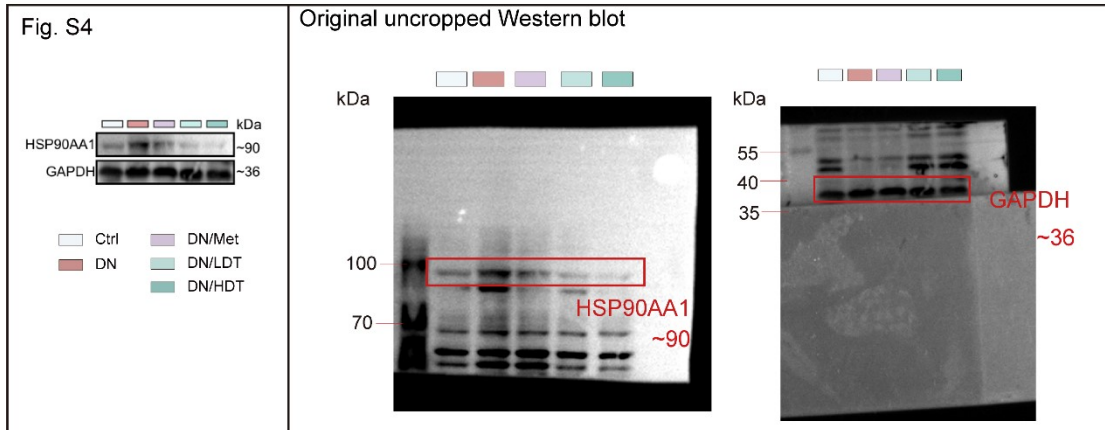

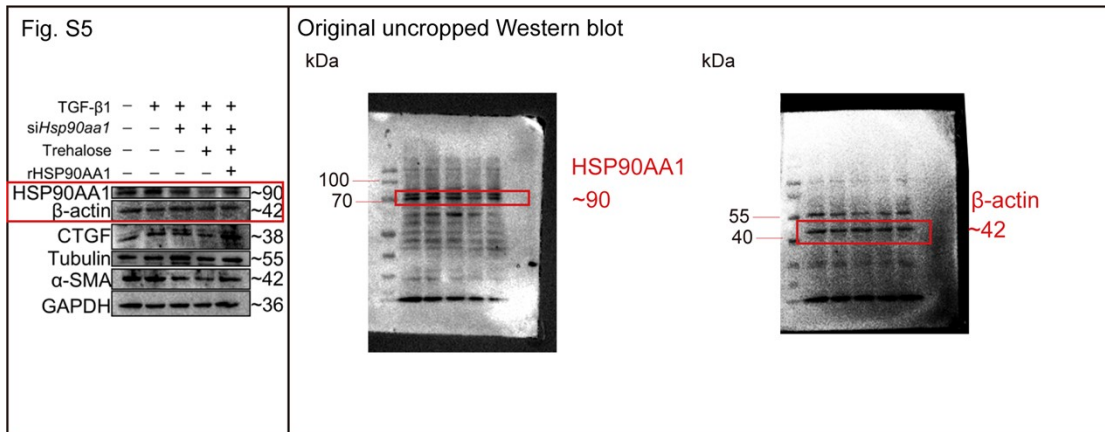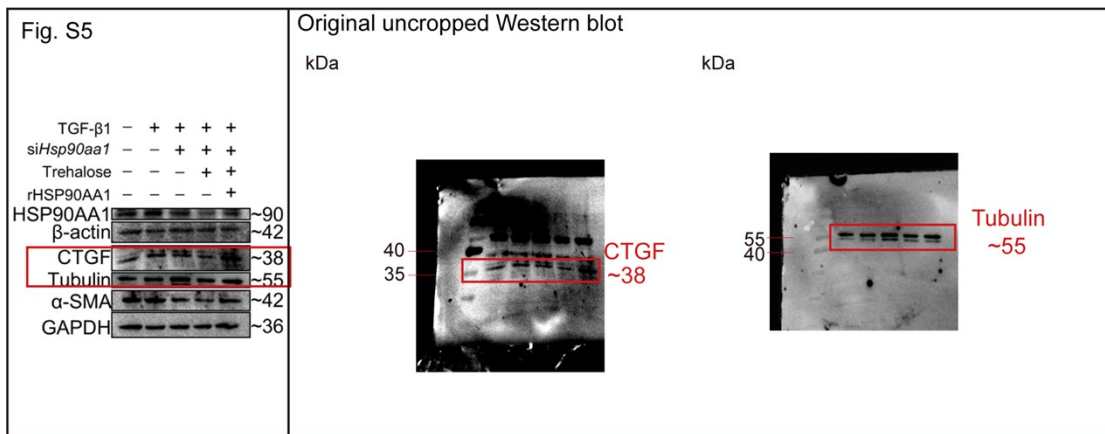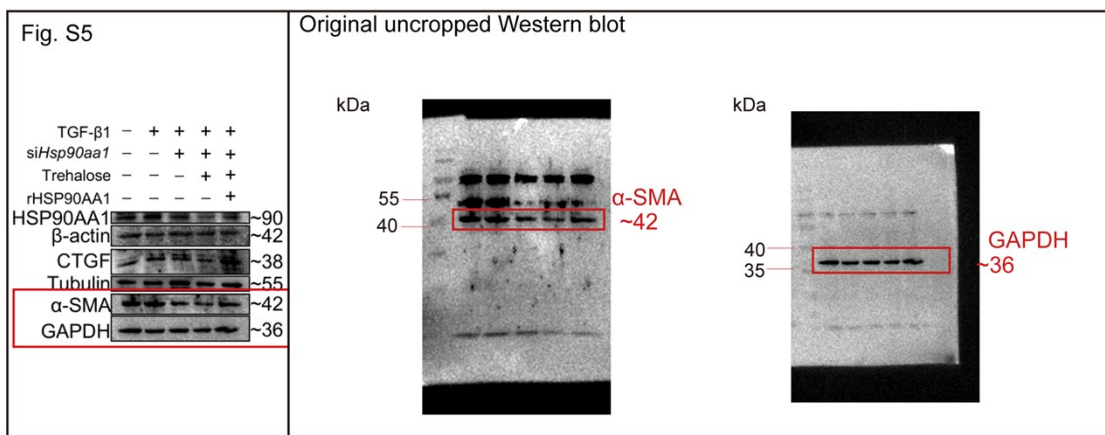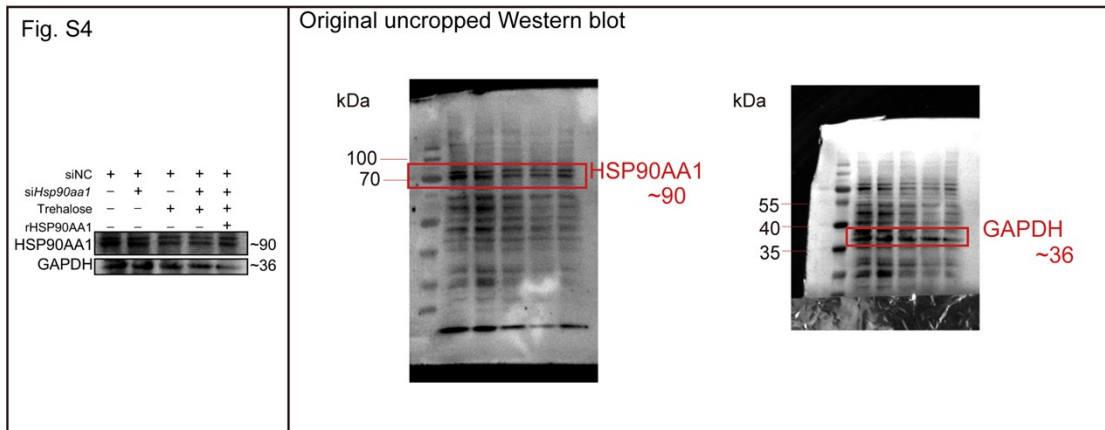

Supplement: d6fo00946h2.pdf [file d6fo00946h2.pdf]
